# Supplementary material
Source: bioRxiv or medRxiv preprint supplement (https://www.biorxiv.org/highwire/filestream/120416/field_highwire_adjunct_files/1/397992-2.pdf)
Supplement: Supplementary file [file 397992-2.pdf]

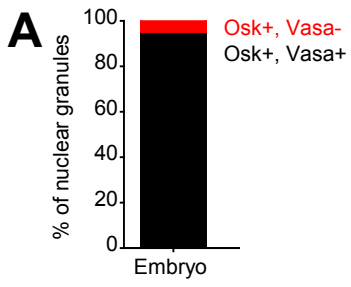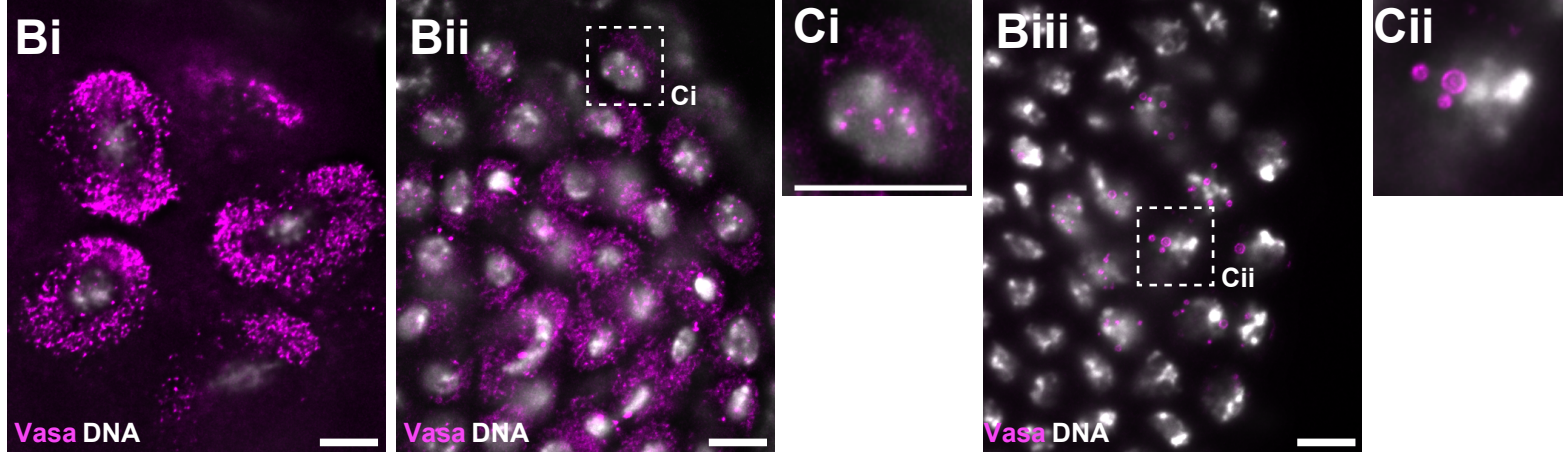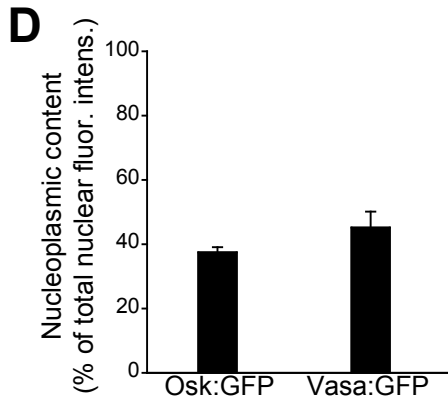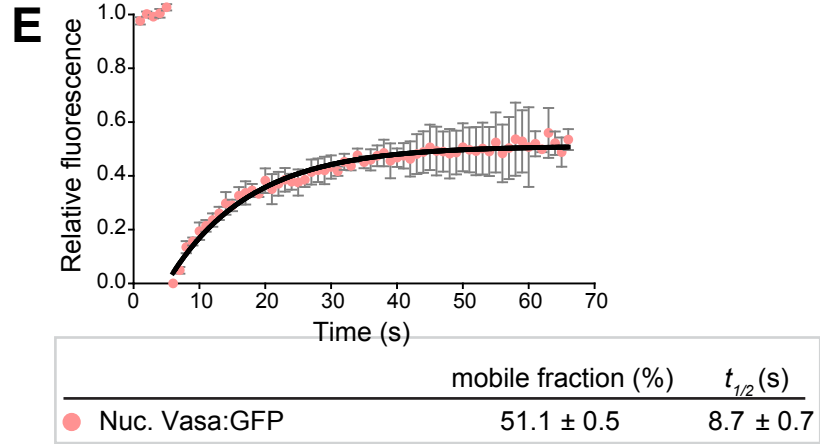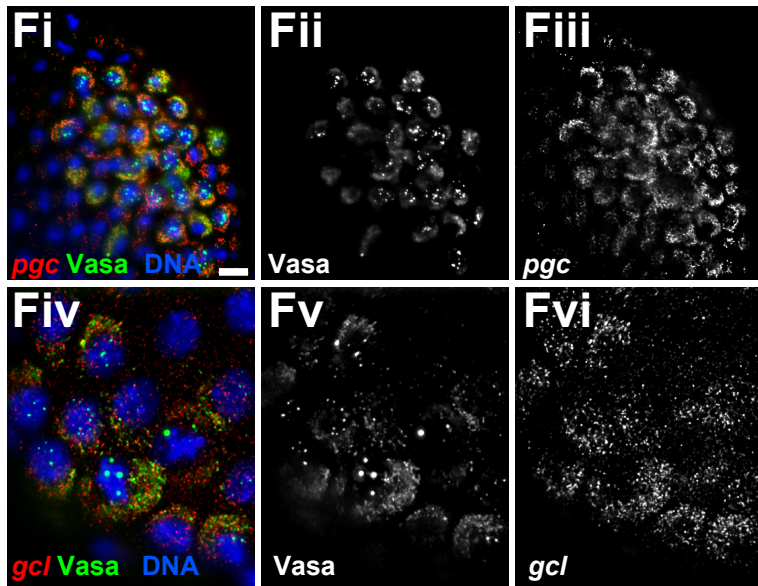

Figure S2
